# Supplementary material for: Semi-analytical modeling and simulation of human red blood cell deformation under non-linear strain
Source: Research Square preprint supplement (doi:10.21203/rs.3.rs-7917082/v1), 2025-12-01
Supplement: Supplementary file 1 [file 684a1d03de3d36096b934a7d.docx]

**Supplementary Information**

**Semi-analytical modeling and simulation of human red blood cell membrane deformation under non-linear strain**

**Gaurav D. Bhabhor1,[[1]](#footnote-1), Rishabh Bhatt2, Arun Anand2 and Kirit N. Lad2,[[2]](#footnote-2)**

1 Department of Physics, Arts, Science & R.A. Patel Commerce College, Bhadran-388 530,

Anand, Gujarat, India.

2 Department of Physics, Sardar Patel University, Vallabh Vidyanagar 388120, Gujarat, India.

1. **Mathematical Formulation to compute the Gaussian Curvature and the Mean Curvature**

Differential geometry can be used to analyse and compute the curvature bending energy of a red blood cell (RBC) surface. Four primary curvature descriptors are usually used in 3D differential geometry: Gaussian curvature (*KG*), mean curvature (*KM*), maximum principal curvature (*k1*), and minimum principal curvature (*k2*) [1]. The scheme proposed by Goldman[2] to compute k1, k2 KM, and KG for implicit surfaces is used in the present work.

A continuous degree-4 surface equation for a RBC is given by,

|  | (1) |
| --- | --- |

where

The cell shape is constrained by three principal dimensions: the diameter (*d*), the minimum thickness (*hmin*) and the maximum thickness (*hmax*). *d* = 8.0 µm, = 1 µm, and = 2 *µm* gives an RBC shape with a volume of 92 fL and a surface area of 135 µ. The values of , and are adjusted to be , , , respectively.

The Goldman scheme[2] for the derivation of KM, and KG requires the following operations on :

1. The gradient of F, denoted as , is defined as the vector of partial derivatives of F with respect to the Cartesian coordinates x, y, and z.

| = | (2) |
| --- | --- |

1. The Hessian matrix of F, denoted by H(F), is a 3×3 matrix composed of the second-order partial derivatives of F.

|  | (3) |
| --- | --- |

1. The adjugate matrix (or cofactor matrix) of H(F), denoted adj(H(F)) or , is defined as:

|  | (4) |
| --- | --- |

The cofactor matrix Cofactor(), where a, b ∈{x, y, z}, is constructed by computing the determinants of the minors associated with each second-derivative component ​ in the Hessian matrix (Eq. 3).

1. The trace of the Hessian matrix is determined by summing the three diagonal entries of H[F] (Eq. 3), resulting in the Laplacian of F.

*Gaussian curvature* :The Gaussian curvature is expressed through the partial derivative vector, its transpose, and the cofactor matrix of the Hessian.

|  | (5) |
| --- | --- |

*Mean curvature .* The mean curvature is given by,

|  | (5) |
| --- | --- |

It should be noted that KG does not depend on the direction of the unit normal, whereas KM depends on the direction of the unit normal. In the present computation, the unit normal to the RBC surface is chosen in the outward direction.

**References**

[1] Modern Differential Geometry of Curves and Surfaces with Mathematica, Third Edition, Chapman and Hall/CRC, 2017. https://doi.org/10.1201/9781315276038.

[2] R. Goldman, Curvature formulas for implicit curves and surfaces, Computer Aided Geometric Design 22 (2005) 632–658. https://doi.org/10.1016/j.cagd.2005.06.005.

1. Corresponding Authors: [gauravbhabhor@spuvvn.edu](mailto:gauravbhabhor@spuvvn.edu), [↑](#footnote-ref-1)
2. [knlad-phy@spuvvn.edu](mailto:knlad-phy@spuvvn.edu) [↑](#footnote-ref-2)
